# Supplementary material for: Long Non-Coding RNAs in Hypoxia and Oxidative Stress: Novel Insights Investigating a Piglet Model of Perinatal Asphyxia
Source: MDPI journal article supplement (doi:10.3390/biology12040549), 2023-04-04
Supplement: s1 [file s1]

“Long non-coding RNAs in hypoxia and oxidative stress - novel insights investigating a piglet model of perinatal asphyxia published” in RNA biology by Benedicte Grebstad Tune, Maria Melheim, Monica Atneosen-Åsegg, Baukje Dotinga, Ola Didrik Saugstad, Rønnaug Solberg, and Lars Oliver Baumbusch at the Department of Pediatric Research, Division of Paediatric and Adolescent Medicine, Oslo University Hospital Rikshospitalet, Oslo, Norway.  
Email: [lars.o.baumbusch@rr-research.no](mailto:lars.o.baumbusch@rr-research.no)

Supplementary Table S1. Piglet sample overview with clinical parameters.

| Study arm   | Piglet | Excluded | Sex (M/F) | Weight (g) | Hypoxia (min) | Autopsy after end hypoxia (min) | Hemoglobin (g/ml) |           | Base excess (mM) | Mean arterial blood pressure (mmHg) |           |
|-------------|--------|----------|-----------|------------|---------------|---------------------------------|-------------------|-----------|------------------|-------------------------------------|-----------|
|             |        |          |           |            |               |                                 | Start study       | End study | End hypoxia      | End hypoxia                         | End study |
| 21% hypoxia | 01     |          | F         | 2025       | 46            | 540                             | 7.9               | 7.4       | -12.4            | 19.7                                | 43.0      |
| Control     | 02     |          | M         | 2190       | 35            | 540                             | 6.9               | 7.8       | -2.2             | 58.0                                | 57.0      |
| 30 min 100% | 03     |          | M         | 2230       | 72            | 540                             | 8.4               | 7.6       | -21.6            | 21.0                                | 37.0      |
| 21% hypoxia | 04     | **       | M         | 2010       | 65            | 540                             | 8.1               | 8.2       | -22.2            | 22.2                                | 28.0      |
| Control     | 05     |          | F         | 1920       | 45            | 570                             | 8.1               | 7.5       | 6.7              | 46.0                                | 59.0      |
| 30 min 100% | 06     |          | M         | 1990       | 45            | 540                             | 9.2               | 8.0       | -6.4             | -22.0                               | 44.0      |
| Control     | 07     |          | F         | 1965       | 45            | 570                             | 8.7               | 8.2       | 5.3              | 56.0                                | 48.0      |
| 21% hypoxia | 08     |          | F         | 1980       | 50            | 570                             | 6.5               | 5.0       | -11.7            | 32.0                                | 32.0      |
| 30 min 100% | 09     |          | F         | 2120       | 32            | 570                             | 7.8               | 8.1       | 0.3              | 44.4                                | 61.0      |
| 21% hypoxia | 10     |          | M         | 2165       | 35            | 570                             | 7.5               | 6.6       | -20.3            | 31.4                                | 81.0      |
| 30 min 100% | 11     |          | M         | 1900       | 20            | 570                             | 6.0               | 4.3       | -17.0            | 19.9                                | 61.0      |
| Control     | 12     |          | M         | 1980       | 45            | 570                             | 8.3               | 8.1       | 0.5              | 53.0                                | 70.0      |
| 21% hypoxia | 13     |          | F         | 1900       | 41            | 570                             | 9.1               | 4.8       | -20.7            | 31.7                                | 29.0      |
| Control     | 14     | **       | M         | 2090       | 45            | 570                             | 9.5               | 8.4       | 4.4              | 56.0                                | 21.0      |
| 21% hypoxia | 15     | *        | F         | 2080       | 170           | 156                             | 7.5               | 8.6       | -21.5            | 25.0                                | 20.0      |
| 30 min 100% | 16     |          | M         | 2020       | 35            | 570                             | 7.6               | 7.0       | -21.2            | 22.3                                | 41.0      |
| 30 min 100% | 17     |          | M         | 2020       | 40            | 570                             | 9.0               | 8.4       | -21.1            | 29.2                                | 42.0      |
| Control     | 18     | **       | F         | 2085       | 45            | 570                             | 9.1               | 7.5       | -1.6             | 59.0                                | 67.0      |
| 30 min 100% | 19     |          | F         | 2065       | 20            | 570                             | 8.9               | 8.1       | -15.5            | 19.5                                | 45.0      |
| 21% hypoxia | 20     |          | F         | 2050       | 15            | 570                             | 8.8               | 8.1       | -9.2             | 19.9                                | 67.0      |
| Control     | 21     |          | F         | 2020       | 45            | 570                             | 7.7               | 7.7       | -3.3             | 59.0                                | 47.0      |
| 3 min 100%  | 22     | *        | N/A       | N/A        | N/A           | N/A                             | N/A               | N/A       | N/A              | N/A                                 | N/A       |
| 3 min 100%  | 23     |          | F         | 1960       | 34            | 570                             | 7.0               | 5.7       | -22.3            | 31.5                                | 46.9      |

|               |    |   |     |      |     |     |     |     |       |      |      |
|---------------|----|---|-----|------|-----|-----|-----|-----|-------|------|------|
| Control       | 24 |   | M   | 1805 | 45  | 570 | 6.9 | 6.2 | 0.7   | 54.0 | 54.0 |
| Control       | 25 |   | F   | 1870 | 45  | 570 | 5.3 | 5.5 | 5.9   | 50.0 | 41.0 |
| 3 min 100%    | 26 |   | F   | 1910 | 20  | 570 | 6.1 | 4.8 | -13.7 | 18.8 | 55.0 |
| 3 min 100%    | 27 |   | M   | 2050 | 24  | 570 | 5.7 | 5.5 | -14.1 | 24.9 | 24.9 |
| 3 min 100%    | 28 |   | M   | 2050 | 28  | 570 | 6.4 | 6.6 | -17.6 | 19.4 | 25.6 |
| 3 min 100%    | 29 |   | F   | 1930 | 53  | 570 | 8.4 | 7.3 | -18.6 | 20.3 | 42.6 |
| 3 min 100%    | 30 |   | M   | 1940 | 50  | 570 | 6.6 | 6.7 | -19.7 | 19.9 | 47.5 |
| 21% hypoxia   | 31 |   | F   | 1890 | 28  | 570 | 6.8 | 6.1 | -23.8 | 19.1 | 28.3 |
| 30 min 100%   | 32 |   | F   | 1995 | 21  | 570 | 7.4 | 6.8 | -10.7 | 19.8 | 50.6 |
| 3 min 100%    | 33 |   | F   | 1910 | 28  | 570 | 6.5 | 6.4 | -19.2 | 32.0 | 57.0 |
| 21% hypoxia   | 34 | * | M   | 2190 | 17  | 210 | 6.3 | 5.8 | -14.0 | 17.9 | 24.7 |
| 21% hypoxia   | 35 |   | M   | 1830 | 44  | 570 | 7.5 | 5.7 | -20.0 | 19.6 | 57.0 |
| 3 min 100%    | 36 |   | M   | 1950 | 38  | 570 | 7.2 | 5.8 | -25.2 | 27.2 | 57.0 |
| Control       | 37 | * | N/A | N/A  | N/A | N/A | N/A | N/A | N/A   | N/A  | N/A  |
| 3 min 100%    | 38 |   | M   | 2085 | 21  | 570 | 6.3 | 5.2 | -10.7 | 19.5 | 49.7 |
| 21% hypoxia   | 39 |   | M   | 1950 | 26  | 570 | 9.2 | 6.2 | -17.6 | 19.7 | 60.1 |
| 30 min 100%   | 40 |   | M   | 1975 | 21  | 570 | 5.2 | 5.0 | -15.8 | 19.1 | 57.8 |
| 21% hypoxia   | 41 | * | M   | 1870 | 50  | 360 | 8.2 | 9.0 | -22.1 | 32.0 | 13.0 |
| 30 min 100%   | 42 |   | F   | 1870 | 42  | 570 | 8.0 | 8.2 | -21.7 | 22.3 | 28.5 |
| Mean values   |    |   |     |      |     |     |     |     |       |      |      |
| Control       |    |   |     | 1992 | 44  | 567 | 7.8 | 7.4 | 1.8   | 50.1 | 51.6 |
| 21% hypoxia   |    |   |     | 1995 | 49  | 483 | 7.8 | 6.8 | -18.0 | 24.2 | 40.3 |
| 3 min 100%    |    |   |     | 1976 | 33  | 570 | 6.7 | 6.0 | -17.9 | 23.7 | 45.1 |
| 30 min 100%   |    |   |     | 2019 | 35  | 564 | 7.9 | 7.2 | -15.1 | 19.6 | 46.8 |
| Median values |    |   |     |      |     |     |     |     |       |      |      |
| Control       |    |   |     | 1980 | 45  | 570 | 8.1 | 7.7 | 0.7   | 56.0 | 54.0 |
| 21% hypoxia   |    |   |     | 1995 | 43  | 570 | 7.7 | 6.4 | -20.2 | 21.1 | 30.5 |
| 3 min 100%    |    |   |     | 1950 | 28  | 570 | 6.5 | 5.8 | -18.6 | 20.3 | 47.5 |
| 30 min 100%   |    |   |     | 2008 | 34  | 570 | 7.9 | 7.8 | -16.4 | 20.5 | 44.5 |

*Supplementary Table S1. Thermocycler program for EvaGreen Supermix prior to ddPCR.*

| <b>Cycling Step</b>  | <b>Temp (°C)</b> | <b>Time</b> | <b>Ramp rate</b> | <b># of cycles</b> |
|----------------------|------------------|-------------|------------------|--------------------|
| Enzyme activation    | 95               | 5 min       | 50%              | 1                  |
| Denaturation         | 95               | 30 sec      |                  | 40                 |
| Annealing/Extension  | 60               | 1 min       |                  |                    |
| Signal Stabilization | 4                | 5 min       |                  | 1                  |
|                      | 90               | 5 min       |                  |                    |
| Hold                 | 4                | $\infty$    |                  |                    |

Supplementary Table S2. Mean Ct-values from qPCR of protein coding genes (mRNA) and long non-coding RNA (lncRNA). and simple overview of the analysis used for each brain region. Genes are either only analyzed on qPCR or analyzed on both qPCR and ddPCR (<sup>a</sup>).

| Brain region  | Cortex              |                     |                     |                     | Hippocampus |        | White matter |        | Cerebellum |        |
|---------------|---------------------|---------------------|---------------------|---------------------|-------------|--------|--------------|--------|------------|--------|
| Study arm     | 1                   | 2                   | 3                   | 4                   | 1           | 2      | 1            | 2      | 1          | 2      |
| <b>mRNA</b>   |                     |                     |                     |                     |             |        |              |        |            |        |
| HIF1a         | 5.07                | 5.48                | N/A                 | N/A                 | 5.01        | 4.99   | 5.19         | 5.53   | 2.60       | 2.68   |
| VEGFA         | 5.28                | 4.27                | N/A                 | N/A                 | 5.21        | 4.22   | 4.73         | 4.26   | 4.93       | 3.82   |
| BDNF          | 11.12               | 9.72                | N/A                 | N/A                 | 7.89        | 7.60   | 11.68        | 11.85  | 8.22       | 8.14   |
| p53           | 6.56                | 6.37                | N/A                 | N/A                 | 6.27        | 6.28   | 5.91         | 6.24   | 5.75       | 5.48   |
| TNFA          | 12.47               | 12.07               | N/A                 | N/A                 | 12.62       | 12.59  | 11.63        | 11.83  | 12.23      | 10.55  |
| <b>LncRNA</b> |                     |                     |                     |                     |             |        |              |        |            |        |
| BDNF-AS       | 6.72 <sup>a</sup>   | 4.74 <sup>a</sup>   | 4.50 <sup>a</sup>   | 4.52 <sup>a</sup>   | 3.85        | 3.43   | 6.03         | 5.70   | 2.83       | 2.41   |
| H19           | 6.24 <sup>a</sup>   | 4.11 <sup>a</sup>   | 4.85 <sup>a</sup>   | 4.30 <sup>a</sup>   | 5.63        | 4.80   | 5.19         | 3.83   | 3.74       | 3.86   |
| MALAT1        | -10.30 <sup>a</sup> | -10.89 <sup>a</sup> | -10.26 <sup>a</sup> | -10.10 <sup>a</sup> | -10.39      | -10.69 | -11.11       | -11.41 | -10.41     | -10.69 |
| ANRIL         | 4.16 <sup>a</sup>   | 3.44 <sup>a</sup>   | 3.99 <sup>a</sup>   | 4.10 <sup>a</sup>   | 2.32        | 2.54   | 2.36         | 1.65   | 3.99       | 3.54   |
| PANDA         | -1.26               | -1.13               | N/A                 | N/A                 | -2.18       | -2.05  | N/A          | N/A    | N/A        | N/A    |
| TUG1          | -1.25               | -0.91               | N/A                 | N/A                 | -2.32       | -2.02  | N/A          | N/A    | N/A        | N/A    |

Abbreviation: <sup>a</sup>, analyzed by both qPCR and ddPCR; N/A; not analyzed; 1, sham-operated control group; 2, Reox-21%; 3, Reox-100%(3'); 4, Reox-100%(30').

Supplementary Table S3. Mean values from ddPCR analysis of endogenous control (TBP) and selected lncRNAs associated with hypoxia and oxidative stress.

| Brain region |                                 | Cortex |       |       |        |
|--------------|---------------------------------|--------|-------|-------|--------|
| Study arm    |                                 | 1      | 2     | 3     | 4      |
| lncRNA       |                                 |        |       |       |        |
| TBP          | Concentration (copies/ $\mu$ L) | 272.74 | 84.56 | 92.14 | 120.49 |
|              | Relative quantity (RQ)          | 1.00   | 0.31  | 0.34  | 0.44   |
| BDNF-AS      | Concentration (copies/ $\mu$ L) | 0.83   | 1.76  | 1.61  | 2.12   |
|              | Relative quantity (RQ)          | 1.00   | 2.12  | 1.94  | 2.56   |
|              | Normalized relative expression  | 1.00   | 6.85  | 5.75  | 5.79   |
| H19          | Concentration (copies/ $\mu$ L) | 3.44   | 4.51  | 3.55  | 5.07   |
|              | Relative quantity (RQ)          | 1.00   | 1.31  | 1.03  | 1.47   |
|              | Normalized relative expression  | 1.00   | 4.22  | 3.05  | 3.33   |

Abbreviation: 1, sham-operated control group; 2, Reox-21%; 3, Reox-100%(3'); 4, Reox-100%(30').

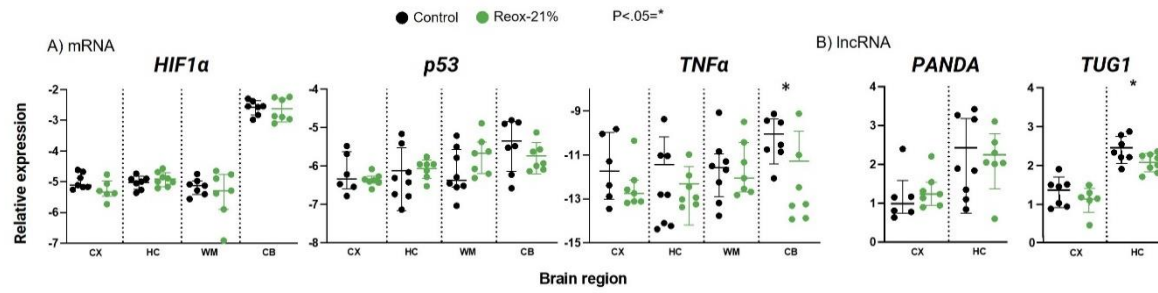

Supplementary Figure S1. Differential expression of hypoxia- and oxidative stress-regulated mRNAs (A) and lncRNAs (B) in cortex (CX), hippocampus (HC), white matter (WM), cerebellum (CB) of the brain in a perinatal asphyxia piglet model, analyzed using qPCR. The control group was exposed to 21% O<sub>2</sub> during the entire procedure, Reox-21% group was exposed to hypoxia (8% O<sub>2</sub>) followed by normoxic reoxygenation (21% O<sub>2</sub>). Relative gene expressions ( $2^{-\Delta C_t}$ ) are shown on a log scale and expressed as either mean  $\pm$  SD (p53, TNF $\alpha$ , TUG1, PANDA: HC, WM, CB; HIF1 $\alpha$ : CX, HC, WM) or median  $\pm$  Interquartile range (PANDA, p53, TNF $\alpha$ : CX; HIF1 $\alpha$ : CB).  $P < .05 = *$ . HIF1 $\alpha$ , Hypoxia-inducible factor  $\alpha$ ; p53, Tumor suppressor gene p53; TNF $\alpha$ , Tumor necrosis factor  $\alpha$ ; PANDA, P21-associated ncRNA DNA damage-activated; TUG1, Taurine Upregulated gene 1.
